# Supplementary material for: Use of antipsychotic drugs and cholinesterase inhibitors and risk of falls and fractures: self-controlled case series
Source: PubMed Central journal article supplement — BMJ. 2021 Sep 9;374:n1925. doi: 10.1136/bmj.n1925 (PMC8427404; doi:10.1136/bmj.n1925), 2021-09-09
Supplement: wang064733.ww.pdf [file wang064733.ww.pdf]

Web extra

**Supplementary Table 1:** ICD codes of diseases included in our study

**Supplementary Table 2:** ATC codes of drugs included in the study

**Supplementary Table 3:** Sensitivity analyses

**Supplementary Table 3-1:** Stratified by sex

**Supplementary Table 3-2:** Stratified by age group

**Supplementary Table 3-3:** Stratified by anticholinergic burden indicator

**Supplementary Table 3-4:** Stratified by cumulative dose of antipsychotic drugs

**Supplementary Table 3-5:** Restricted to outcomes at outpatient settings only

**Supplementary Table 3-6:** Re-selected patients without excluding schizophrenia and bipolar disorder

**Supplementary Table 3-7:** Removed patients who died

**Supplementary Table 3-8:** Redefined outcome by specific codes

**Supplementary Table 3-9:** Counting all episodes of falls and fractures

**Supplementary Table 3-10:** Redefined the length of the pretreatment period

**Supplementary Table 3-11:** Focusing on individual antipsychotic drugs

**Supplementary Table 3-12:** Further defined two study periods of 14 days: one after treatment initiation,  
the other following treatment discontinuation

**Supplementary Figure 1:** Study scheme and definitions of treatment periods for sensitivity analysis

**Supplementary Table 1: ICD code of diseases included in our study**

|                                | ICD-9-CM                                                       | ICD-10-CM                                        |
|--------------------------------|----------------------------------------------------------------|--------------------------------------------------|
| <b>Comorbidities</b>           |                                                                |                                                  |
| Major neurocognitive disorders | 290.0, 290.1, 290.2, 290.3, 290.4, 294.1, 331.0, 331.1, 331.82 | F01, F02, F03, G30, G31.83                       |
| Alzheimer's disease            | 331.0                                                          | G30                                              |
| Parkinson's dementia*          | 331.82                                                         | G31.83                                           |
| Vascular dementia              | 290.4                                                          | F01                                              |
| Others or unspecified          | 290.0, 290.1, 290.2, 290.3, 294.1, 331.1                       | F02, F03                                         |
| Schizophrenia                  | 295                                                            | F20, F21, F25                                    |
| Bipolar disorder               | 296.0, 296.1, 296.4–296.8                                      | F30, F31                                         |
| Depression                     | 296.2, 296.3, 300.4, 311                                       | F32, F33, F341                                   |
| Parkinson's disease            | 332.0                                                          | G20                                              |
| Epilepsy                       | 345                                                            | G40                                              |
| Hypertension                   | 401-405                                                        | I10-I16                                          |
| Diabetes mellitus              | 250                                                            | E11                                              |
| Hyperlipidaemia                | 272                                                            | E78                                              |
| Coronary artery disease        | 410-414                                                        | I20-I25                                          |
| Atrial fibrillation            | 427.31                                                         | I48.91                                           |
| Heart failure                  | 428                                                            | I50                                              |
| Ischemic stroke                | 433–437                                                        | I63-I68                                          |
| Osteoarthritis                 | 715                                                            | M15-M19                                          |
| Osteoporosis                   | 733.0                                                          | M80, M81                                         |
| Cataract                       | 366.0-366.4                                                    | H25, H26                                         |
| <b>Outcomes</b>                |                                                                |                                                  |
| Falls                          | E880-E888                                                      | W00-W19                                          |
| Falls from a different level   | E880-E884                                                      | W00.1, W00.2, W05-W17                            |
| Falls on the same level        | E885-E886                                                      | W00.0, W01-W04, W18                              |
| Traumatic fractures            | 800-829                                                        | S02, S12, S22, S32, S42, S52, S62, S72, S82, S92 |
| Hip fractures                  | 820                                                            | S72                                              |

\*Note: Parkinson's dementia was defined as dementia with Lewy bodies or any subtype of major neurocognitive disorders plus the diagnosis of Parkinson's disease.

**Supplementary Table 2: ATC codes of drugs included in our study.**

| Category                  | Drugs                                           | ATC codes    |
|---------------------------|-------------------------------------------------|--------------|
| Cholinesterase inhibitors | Donepezil                                       | N06DA02      |
| Cholinesterase inhibitors | Rivastigmine                                    | N06DA03      |
| Cholinesterase inhibitors | Galantamine                                     | N06DA04      |
| Antipsychotic drugs       | Chlorpromazine                                  | N05AA01      |
| Antipsychotic drugs       | Levomepromazine                                 | N05AA02      |
| Antipsychotic drugs       | Fluphenazine                                    | N05AB02      |
| Antipsychotic drugs       | Perphenazine                                    | N05AB03      |
| Antipsychotic drugs       | Trifluoperazine                                 | N05AB06      |
| Antipsychotic drugs       | Thioridazine                                    | N05AC02      |
| Antipsychotic drugs       | Pipotiazine                                     | N05AC04      |
| Antipsychotic drugs       | Haloperidol                                     | N05AD01      |
| Antipsychotic drugs       | Moperone                                        | N05AD04      |
| Antipsychotic drugs       | Droperidol                                      | N05AD08      |
| Antipsychotic drugs       | Flupentixol                                     | N05AF01      |
| Antipsychotic drugs       | Clopenthixol                                    | N05AF02      |
| Antipsychotic drugs       | Chlorprothixene                                 | N05AF03      |
| Antipsychotic drugs       | Zuclopenthixol                                  | N05AF05      |
| Antipsychotic drugs       | Pimozide                                        | N05AG02      |
| Antipsychotic drugs       | Penfluridol                                     | N05AG03      |
| Antipsychotic drugs       | Loxapine                                        | N05AH01      |
| Antipsychotic drugs       | Sulpiride                                       | N05AL01      |
| Antipsychotic drugs       | Ziprasidone                                     | N05AE04      |
| Antipsychotic drugs       | Lurasidone                                      | N05AE05      |
| Antipsychotic drugs       | Clozapine                                       | N05AH02      |
| Antipsychotic drugs       | Olanzapine                                      | N05AH03      |
| Antipsychotic drugs       | Quetiapine                                      | N05AH04      |
| Antipsychotic drugs       | Clotiapine                                      | N05AH06      |
| Antipsychotic drugs       | Amisulpride                                     | N05AL05      |
| Antipsychotic drugs       | Risperidone                                     | N05AX08      |
| Antipsychotic drugs       | Zotepine                                        | N05AX11      |
| Antipsychotic drugs       | Aripiprazole                                    | N05AX12      |
| Antipsychotic drugs       | Paliperidone                                    | N05AX13      |
| Antipsychotic drugs       | Brexpiprazole                                   | N05AX16      |
| Co-administered drugs     | Antidepressants                                 | N06A         |
| Co-administered drugs     | Psychostimulants                                | N06B         |
| Co-administered drugs     | Anxiolytics                                     | N05B         |
| Co-administered drugs     | Hypnotics and sedatives                         | N05C         |
| Co-administered drugs     | Antiparkinsonian agents                         | N04          |
| Co-administered drugs     | Anticonvulsants                                 | N03A         |
| Co-administered drugs     | Muscle relaxants                                | M03          |
| Co-administered drugs     | Vasodilators                                    | C01D, C04    |
| Co-administered drugs     | Antihypertensive drugs                          | C02          |
| Co-administered drugs     | Diuretics                                       | C03          |
| Co-administered drugs     | Renin–angiotensin–aldosterone system inhibitors | C09          |
| Co-administered drugs     | Beta-blockers                                   | C07          |
| Co-administered drugs     | Calcium channel blockers                        | C08          |
| Co-administered drugs     | Antidiabetic agents                             | A10          |
| Co-administered drugs     | Lipid modifying agents                          | C10          |
| Co-administered drugs     | Antiarrhythmic agents (class 1 and 3)           | C01B         |
| Co-administered drugs     | Antithrombotic agents                           | B01A         |
| Co-administered drugs     | Steroid (systemic use)                          | H02          |
| Co-administered drugs     | Non-steroidal anti-inflammatory drugs           | M01A         |
| Co-administered drugs     | Bisphosphonates                                 | M05BA, M05BB |
| Co-administered drugs     | Parasympathomimetic drugs                       | N07A         |
| Co-administered drugs     | Antihistamine                                   | R06A         |

**Supplementary Table 3-1: Sensitivity analysis (stratified by sex)**

|                                | Events, n | Follow-up time,<br>person-years,<br>sum | Follow-up time,<br>years, median<br>(interquartile range) | Incidence rate<br>(95% confidence interval),<br>/100 person-years | Crude incidence rate ratio<br>(95% confidence interval) | Adjusted incidence rate ratio<br>(95% confidence interval) |
|--------------------------------|-----------|-----------------------------------------|-----------------------------------------------------------|-------------------------------------------------------------------|---------------------------------------------------------|------------------------------------------------------------|
| <b>Male (n=5,088)</b>          |           |                                         |                                                           |                                                                   |                                                         |                                                            |
| Non-treatment                  | 3,239     | 40,347.80                               | 8.40 (4.08)                                               | 8.03 (7.76 to 8.31)                                               | Reference                                               | Reference                                                  |
| Pretreatment                   | 285       | 421.32                                  | 0.07 (0.04)                                               | 67.64 (60.13 to 75.85)                                            | 8.43 (7.47 to 9.51)                                     | 7.63 (6.73 to 8.65)                                        |
| Cholinesterase inhibitor alone | 636       | 6,354.09                                | 0.98 (1.82)                                               | 10.01 (9.25 to 10.81)                                             | 1.25 (1.15 to 1.36)                                     | 1.18 (1.06 to 1.30)                                        |
| Antipsychotic drug alone       | 485       | 3,844.57                                | 0.31 (1.01)                                               | 12.62 (11.53 to 13.78)                                            | 1.57 (1.43 to 1.73)                                     | 1.55 (1.38 to 1.75)                                        |
| Combination                    | 443       | 3,591.78                                | 0.49 (1.15)                                               | 12.33 (11.22 to 13.52)                                            | 1.54 (1.39 to 1.70)                                     | 1.48 (1.31 to 1.67)                                        |
| <b>Female (n=10,190)</b>       |           |                                         |                                                           |                                                                   |                                                         |                                                            |
| Non-treatment                  | 6,969     | 82,615.20                               | 8.62 (3.97)                                               | 8.44 (8.24 to 8.64)                                               | Reference                                               | Reference                                                  |
| Pretreatment                   | 372       | 833.58                                  | 0.07 (0.03)                                               | 44.63 (40.26 to 49.34)                                            | 5.29 (4.77 to 5.87)                                     | 5.35 (4.80 to 5.95)                                        |
| Cholinesterase inhibitor alone | 1,154     | 12,664.24                               | 0.96 (1.96)                                               | 9.11 (8.60 to 9.65)                                               | 1.08 (1.01 to 1.15)                                     | 1.16 (1.07 to 1.25)                                        |
| Antipsychotic drug alone       | 868       | 9,242.88                                | 0.38 (1.33)                                               | 9.39 (8.78 to 10.03)                                              | 1.11 (1.04 to 1.19)                                     | 1.24 (1.13 to 1.35)                                        |
| Combination                    | 827       | 8,445.56                                | 0.60 (1.38)                                               | 9.79 (9.14 to 10.48)                                              | 1.16 (1.08 to 1.25)                                     | 1.29 (1.18 to 1.41)                                        |

**Supplementary Table 3-2: Sensitivity analysis (stratified by age group)**

|                                        | Events, n | Follow-up time, person-years, sum | Follow-up time, years, median (interquartile range) | Incidence rate (95% confidence interval), /100 person-years | Crude incidence rate ratio (95% confidence interval) | Adjusted incidence rate ratio (95% confidence interval) |
|----------------------------------------|-----------|-----------------------------------|-----------------------------------------------------|-------------------------------------------------------------|------------------------------------------------------|---------------------------------------------------------|
| <b>Age group 65-74 years (n=3,137)</b> |           |                                   |                                                     |                                                             |                                                      |                                                         |
| Non-treatment                          | 2,694     | 26,387.62                         | 8.97 (3.69)                                         | 10.21 (9.83 to 10.60)                                       | Reference                                            | Reference                                               |
| Pretreatment                           | 38        | 256.82                            | 0.07 (0.03)                                         | 14.80 (10.62 to 20.10)                                      | 1.45 (1.05 to 2.00)                                  | 2.81 (2.03 to 3.90)                                     |
| Cholinesterase inhibitor alone         | 183       | 3,882.57                          | 0.98 (1.83)                                         | 4.71 (4.07 to 5.44)                                         | 0.46 (0.40 to 0.54)                                  | 1.16 (0.95 to 1.40)                                     |
| Antipsychotic drug alone               | 131       | 2,621.04                          | 0.32 (1.19)                                         | 5.00 (4.20 to 5.91)                                         | 0.49 (0.41 to 0.58)                                  | 1.56 (1.25 to 1.93)                                     |
| Combination                            | 91        | 2,323.16                          | 0.55 (1.27)                                         | 3.92 (3.17 to 4.79)                                         | 0.38 (0.31 to 0.47)                                  | 1.67 (1.29 to 2.16)                                     |
| <b>Age group 75-84 years (n=8,703)</b> |           |                                   |                                                     |                                                             |                                                      |                                                         |
| Non-treatment                          | 5,794     | 70,261.66                         | 8.58 (3.97)                                         | 8.25 (8.04 to 8.46)                                         | Reference                                            | Reference                                               |
| Pretreatment                           | 377       | 713.91                            | 0.07 (0.03)                                         | 52.81 (47.68 to 58.35)                                      | 6.40 (5.77 to 7.11)                                  | 6.11 (5.49 to 6.80)                                     |
| Cholinesterase inhibitor alone         | 1,051     | 10,778.09                         | 0.96 (1.90)                                         | 9.75 (9.18 to 10.35)                                        | 1.18 (1.11 to 1.26)                                  | 1.18 (1.09 to 1.28)                                     |
| Antipsychotic drug alone               | 775       | 7,409.98                          | 0.35 (1.21)                                         | 10.46 (9.47 to 11.22)                                       | 1.27 (1.18 to 1.37)                                  | 1.28 (1.17 to 1.41)                                     |
| Combination                            | 706       | 6,936.38                          | 0.57 (1.27)                                         | 10.18 (9.45 to 10.95)                                       | 1.23 (1.14 to 1.33)                                  | 1.25 (1.14 to 1.37)                                     |
| <b>Age group 85+ years (n=3,438)</b>   |           |                                   |                                                     |                                                             |                                                      |                                                         |
| Non-treatment                          | 1,720     | 26,313.73                         | 8.00 (4.31)                                         | 6.54 (6.23 to 6.85)                                         | Reference                                            | Reference                                               |
| Pretreatment                           | 242       | 284.17                            | 0.07 (0.04)                                         | 85.16 (74.93 to 96.41)                                      | 13.03 (11.39 to 14.90)                               | 8.07 (7.03 to 9.26)                                     |
| Cholinesterase inhibitor alone         | 556       | 4,357.67                          | 0.95 (2.11)                                         | 12.76 (11.73 to 13.85)                                      | 1.95 (1.77 to 2.15)                                  | 1.29 (1.15 to 1.45)                                     |
| Antipsychotic drug alone               | 447       | 3,056.43                          | 0.37 (1.21)                                         | 14.62 (13.32 to 16.03)                                      | 2.24 (2.02 to 2.48)                                  | 1.20 (1.05 to 1.37)                                     |
| Combination                            | 473       | 2,777.82                          | 0.55 (1.41)                                         | 17.03 (15.54 to 18.61)                                      | 2.61 (2.35 to 2.88)                                  | 1.51 (1.33 to 1.72)                                     |

**Supplementary Table 3-3: Sensitivity analysis (stratified by anticholinergic burden indicator)**

|                                                 | Events,<br>n | Follow-up time,<br>person-years,<br>sum | Follow-up time,<br>years, median<br>(interquartile range) | Incidence rate<br>(95% confidence interval),<br>/100 person-years | Crude incidence rate ratio<br>(95% confidence interval) | Adjusted incidence rate ratio<br>(95% confidence interval) |
|-------------------------------------------------|--------------|-----------------------------------------|-----------------------------------------------------------|-------------------------------------------------------------------|---------------------------------------------------------|------------------------------------------------------------|
| <b>Anticholinergic drug scale 2+ (n= 6,579)</b> |              |                                         |                                                           |                                                                   |                                                         |                                                            |
| Non-treatment                                   | 4,008        | 51,202.55                               | 8.23 (4.28)                                               | 7.83 (7.59 to 8.07)                                               | Reference                                               | Reference                                                  |
| Pretreatment                                    | 326          | 546.27                                  | 0.07 (0.04)                                               | 59.68 (53.46 to 66.43)                                            | 7.62 (6.81 to 8.53)                                     | 7.41 (6.60 to 8.33)                                        |
| Cholinesterase inhibitor alone                  | 828          | 8,133.35                                | 0.97 (1.93)                                               | 10.18 (9.51 to 10.89)                                             | 1.30 (1.21 to 1.40)                                     | 1.35 (1.24 to 1.48)                                        |
| Antipsychotic drug alone                        | 745          | 6,076.65                                | 0.38 (1.34)                                               | 12.26 (11.40 to 13.16)                                            | 1.57 (1.45 to 1.69)                                     | 1.76 (1.60 to 1.95)                                        |
| Combination                                     | 672          | 5,664.66                                | 0.64 (1.45)                                               | 11.86 (10.99 to 12.79)                                            | 1.52 (1.40 to 1.64)                                     | 1.67 (1.51 to 1.85)                                        |
| <b>Anticholinergic drug scale 0-1 (n=8,699)</b> |              |                                         |                                                           |                                                                   |                                                         |                                                            |
| Non-treatment                                   | 6,200        | 71,760.45                               | 8.75 (3.79)                                               | 8.64 (8.43 to 8.86)                                               | Reference                                               | Reference                                                  |
| Pretreatment                                    | 331          | 708.62                                  | 0.07 (0.03)                                               | 46.71 (41.88 to 51.95)                                            | 5.41 (4.84 to 6.04)                                     | 5.30 (4.74 to 5.94)                                        |
| Cholinesterase inhibitor alone                  | 962          | 10,884.98                               | 0.96 (1.91)                                               | 8.84 (8.29 to 9.41)                                               | 1.02 (0.96 to 1.09)                                     | 1.05 (0.96 to 1.13)                                        |
| Antipsychotic drug alone                        | 608          | 7010.80                                 | 0.33 (1.14)                                               | 8.67 (8.00 to 9.38)                                               | 1.00 (0.92 to 1.09)                                     | 1.02 (0.93 to 1.13)                                        |
| Combination                                     | 598          | 6372.69                                 | 0.50 (1.20)                                               | 9.38 (8.65 to 10.16)                                              | 1.09 (1.00 to 1.18)                                     | 1.11 (1.01 to 1.23)                                        |

**Supplementary Table 3-4: Sensitivity analysis (stratified by cumulative dose of antipsychotic drugs)**

|                                                          | Events,<br>n | Follow-up time,<br>person-years,<br>sum | Follow-up time,<br>years, median<br>(interquartile range) | Incidence rate<br>(95% confidence interval),<br>/100 person-years | Crude incidence rate ratio<br>(95% confidence interval) | Adjusted incidence rate ratio<br>(95% confidence interval) |
|----------------------------------------------------------|--------------|-----------------------------------------|-----------------------------------------------------------|-------------------------------------------------------------------|---------------------------------------------------------|------------------------------------------------------------|
| <b>Higher than the median value (n=3,232)</b>            |              |                                         |                                                           |                                                                   |                                                         |                                                            |
| Non-treatment                                            | 855          | 21,593.70                               | 6.91 (4.36)                                               | 3.96 (3.70 to 4.23)                                               | Reference                                               | Reference                                                  |
| Pretreatment                                             | 78           | 279.17                                  | 0.07 (0.04)                                               | 27.94 (22.24 to 34.68)                                            | 7.06 (5.60 to 8.90)                                     | 5.73 (4.54 to 7.24)                                        |
| Cholinesterase inhibitor alone                           | 386          | 3,575.33                                | 0.88 (1.89)                                               | 10.80 (9.76 to 11.91)                                             | 2.73 (2.42 to 3.07)                                     | 2.04 (1.77 to 2.35)                                        |
| Antipsychotic drug alone                                 | 938          | 5,222.99                                | 1.03 (2.28)                                               | 17.96 (16.84 to 19.14)                                            | 4.54 (4.13 to 4.98)                                     | 3.80 (3.38 to 4.27)                                        |
| Combination                                              | 975          | 4,295.59                                | 1.03 (1.79)                                               | 22.70 (21.31 to 24.16)                                            | 5.73 (5.23 to 6.28)                                     | 5.38 (4.79 to 6.05)                                        |
| <b>Equal to or lower than the median value (n=3,247)</b> |              |                                         |                                                           |                                                                   |                                                         |                                                            |
| Non-treatment                                            | 1,818        | 27,044.47                               | 8.90 (3.98)                                               | 6.72 (6.41 to 7.04)                                               | Reference                                               | Reference                                                  |
| Pretreatment                                             | 129          | 285.56                                  | 0.07 (0.04)                                               | 45.17 (37.87 to 53.49)                                            | 6.72 (5.62 to 8.03)                                     | 5.45 (4.54 to 6.53)                                        |
| Cholinesterase inhibitor alone                           | 590          | 4,464.33                                | 0.97 (2.12)                                               | 13.22 (12.18 to 14.31)                                            | 1.97 (1.79 to 2.16)                                     | 1.66 (1.48 to 1.87)                                        |
| Antipsychotic drug alone                                 | 415          | 2,041.81                                | 0.21 (0.74)                                               | 20.33 (18.44 to 22.35)                                            | 3.02 (2.72 to 3.36)                                     | 2.91 (2.54 to 3.33)                                        |
| Combination                                              | 295          | 1,797.32                                | 0.38 (0.97)                                               | 16.41 (14.62 to 18.37)                                            | 2.44 (2.16 to 2.76)                                     | 2.12 (1.82 to 2.47)                                        |

**Supplementary Table 3-5: Sensitivity analysis (restricted to outcomes at outpatient settings only, n=7,914)**

|                                | Events, n | Follow-up time, person-years, sum | Follow-up time, years, median (interquartile range) | Incidence rate (95% confidence interval), /100 person-years | Crude incidence rate ratio (95% confidence interval) | Adjusted incidence rate ratio (95% confidence interval) |
|--------------------------------|-----------|-----------------------------------|-----------------------------------------------------|-------------------------------------------------------------|------------------------------------------------------|---------------------------------------------------------|
| Non-treatment                  | 5,826     | 64,652.78                         | 8.65 (3.86)                                         | 9.01 (8.78 to 9.25)                                         | Reference                                            | Reference                                               |
| Pretreatment                   | 141       | 646.13                            | 0.07 (0.03)                                         | 21.82 (18.44 to 25.66)                                      | 2.42 (2.05 to 2.86)                                  | 2.54 (2.14 to 3.01)                                     |
| Cholinesterase inhibitor alone | 881       | 10,012.89                         | 0.98 (1.98)                                         | 8.80 (8.23 to 9.39)                                         | 0.98 (0.91 to 1.05)                                  | 1.09 (1.00 to 1.19)                                     |
| Antipsychotic drug alone       | 571       | 6,502.65                          | 0.34 (1.16)                                         | 8.78 (8.08 to 9.52)                                         | 0.97 (0.89 to 1.06)                                  | 1.12 (1.01 to 1.25)                                     |
| Combination                    | 495       | 6,131.50                          | 0.55 (1.27)                                         | 8.07 (7.39 to 8.81)                                         | 0.90 (0.82 to 0.98)                                  | 1.02 (0.91 to 1.13)                                     |



**Supplementary Table 3-6: Sensitivity analysis (re-selected patients without excluding schizophrenia and bipolar disorder)**

|                                            | Events, n | Follow-up time, person-years, sum | Follow-up time, years, median (interquartile range) | Incidence rate (95% confidence interval), /100 person-years | Crude incidence rate ratio (95% confidence interval) | Adjusted incidence rate ratio (95% confidence interval) |
|--------------------------------------------|-----------|-----------------------------------|-----------------------------------------------------|-------------------------------------------------------------|------------------------------------------------------|---------------------------------------------------------|
| <b>All patients (15,791)</b>               |           |                                   |                                                     |                                                             |                                                      |                                                         |
| Non-treatment                              | 10,541    | 126,870.74                        | 8.54 (4.03)                                         | 8.31 (8.15 to 8.47)                                         | Reference                                            | Reference                                               |
| Pretreatment                               | 670       | 1,299.57                          | 0.07 (0.03)                                         | 51.56 (47.76 to 55.57)                                      | 6.21 (5.74 to 6.71)                                  | 6.07 (5.60 to 6.57)                                     |
| Cholinesterase inhibitor alone             | 1,829     | 19,437.05                         | 0.96 (1.91)                                         | 9.41 (8.99 to 9.85)                                         | 1.13 (1.08 to 1.19)                                  | 1.17 (1.10 to 1.24)                                     |
| Antipsychotic drug alone                   | 1,435     | 13,941.15                         | 0.36 (1.24)                                         | 10.29 (9.77 to 10.84)                                       | 1.24 (1.17 to 1.31)                                  | 1.32 (1.24 to 1.42)                                     |
| Combination                                | 1,316     | 12,567.72                         | 0.56 (1.32)                                         | 10.47 (9.92 to 11.05)                                       | 1.26 (1.19 to 1.33)                                  | 1.33 (1.24 to 1.43)                                     |
| <b>With schizophrenia (n=98)</b>           |           |                                   |                                                     |                                                             |                                                      |                                                         |
| Non-treatment                              | 60        | 711.20                            | 7.95 (5.66)                                         | 8.44 (6.50 to 10.78)                                        | Reference                                            | Reference                                               |
| Pretreatment                               | 2         | 8.70                              | 0.07 (0.04)                                         | 22.99 (3.85 to 75.95)                                       | 2.76 (0.67 to 11.28)                                 | 2.94 (0.70 to 12.37)                                    |
| Cholinesterase inhibitor alone             | 3         | 59.73                             | 0.45 (1.06)                                         | 5.02 (1.28 to 13.67)                                        | 0.60 (0.19 to 1.90)                                  | 0.66 (0.16 to 2.72)                                     |
| Antipsychotic drug alone                   | 21        | 210.63                            | 1.25 (2.79)                                         | 9.97 (6.34 to 14.98)                                        | 1.18 (0.72 to 1.94)                                  | 1.55 (0.80 to 2.99)                                     |
| Combination                                | 12        | 101.84                            | 0.54 (0.96)                                         | 11.78 (6.38 to 20.03)                                       | 1.40 (0.75 to 2.60)                                  | 1.79 (0.75 to 4.28)                                     |
| <b>Without schizophrenia (n=15,693)</b>    |           |                                   |                                                     |                                                             |                                                      |                                                         |
| Non-treatment                              | 10,481    | 126,159.54                        | 8.54 (4.02)                                         | 8.31 (8.15 to 8.47)                                         | Reference                                            | Reference                                               |
| Pretreatment                               | 668       | 1,290.97                          | 0.07 (0.03)                                         | 51.74 (47.93 to 55.78)                                      | 6.23 (5.76 to 6.74)                                  | 6.08 (5.61 to 6.59)                                     |
| Cholinesterase inhibitor alone             | 1,826     | 19,377.32                         | 0.96 (1.91)                                         | 9.42 (9.00 to 9.86)                                         | 1.13 (1.08 to 1.19)                                  | 1.17 (1.10 to 1.24)                                     |
| Antipsychotic drug alone                   | 1,414     | 13,730.52                         | 0.36 (1.23)                                         | 10.30 (9.77 to 10.85)                                       | 1.24 (1.17 to 1.31)                                  | 1.32 (1.23 to 1.42)                                     |
| Combination                                | 1,304     | 12,465.88                         | 0.57 (1.32)                                         | 10.46 (9.90 to 11.04)                                       | 1.26 (1.19 to 1.33)                                  | 1.33 (1.24 to 1.43)                                     |
| <b>With bipolar disorder (n=426)</b>       |           |                                   |                                                     |                                                             |                                                      |                                                         |
| Non-treatment                              | 277       | 3,257.41                          | 8.02 (4.10)                                         | 8.50 (7.55 to 9.55)                                         | Reference                                            | Reference                                               |
| Pretreatment                               | 11        | 37.04                             | 0.07 (0.04)                                         | 29.70 (15.62 to 51.62)                                      | 3.49 (1.91 to 6.38)                                  | 3.24 (1.76 to 5.99)                                     |
| Cholinesterase inhibitor alone             | 37        | 362.88                            | 0.56 (1.60)                                         | 10.20 (7.29 to 13.91)                                       | 1.20 (0.85 to 1.69)                                  | 1.19 (0.79 to 1.81)                                     |
| Antipsychotic drug alone                   | 67        | 688.24                            | 0.77 (2.41)                                         | 9.74 (7.60 to 12.29)                                        | 1.14 (0.88 to 1.49)                                  | 1.12 (0.80 to 1.58)                                     |
| Combination                                | 34        | 435.18                            | 0.74 (1.68)                                         | 7.81 (5.50 to 10.79)                                        | 0.92 (0.64 to 1.31)                                  | 0.84 (0.55 to 1.30)                                     |
| <b>Without bipolar disorder (n=15,365)</b> |           |                                   |                                                     |                                                             |                                                      |                                                         |
| Non-treatment                              | 10,264    | 123,613.33                        | 8.55 (4.02)                                         | 8.30 (8.14 to 8.47)                                         | Reference                                            | Reference                                               |
| Pretreatment                               | 659       | 1,262.54                          | 0.07 (0.03)                                         | 52.20 (48.32 to 56.30)                                      | 6.29 (5.81 to 6.80)                                  | 6.15 (5.67 to 6.67)                                     |
| Cholinesterase inhibitor alone             | 1,792     | 19,074.17                         | 0.96 (1.92)                                         | 9.40 (8.97 to 9.84)                                         | 1.13 (1.08 to 1.19)                                  | 1.17 (1.10 to 1.24)                                     |
| Antipsychotic drug alone                   | 1,368     | 13,252.92                         | 0.35 (1.21)                                         | 10.32 (9.79 to 10.88)                                       | 1.24 (1.17 to 1.32)                                  | 1.33 (1.24 to 1.43)                                     |
| Combination                                | 1,282     | 12,132.54                         | 0.56 (1.31)                                         | 10.57 (10.00 to 11.16)                                      | 1.27 (1.20 to 1.35)                                  | 1.35 (1.26 to 1.45)                                     |
| <b>With depression (n=4,743)</b>           |           |                                   |                                                     |                                                             |                                                      |                                                         |
| Non-treatment                              | 3,321     | 38,500.25                         | 8.65 (3.92)                                         | 8.63 (8.34 to 8.92)                                         | Reference                                            | Reference                                               |
| Pretreatment                               | 144       | 399.33                            | 0.07 (0.04)                                         | 36.06 (30.52 to 42.32)                                      | 4.18 (3.54 to 4.94)                                  | 4.13 (3.49 to 4.90)                                     |
| Cholinesterase inhibitor alone             | 435       | 5,049.01                          | 0.86 (1.76)                                         | 8.62 (7.83 to 9.45)                                         | 1.00 (0.90 to 1.10)                                  | 1.03 (0.91 to 1.16)                                     |
| Antipsychotic drug alone                   | 465       | 5,029.55                          | 0.48 (1.51)                                         | 9.25 (8.43 to 10.11)                                        | 1.07 (0.97 to 1.18)                                  | 1.12 (1.00 to 1.27)                                     |
| Combination                                | 378       | 4,287.04                          | 0.67 (1.44)                                         | 8.82 (7.96 to 9.74)                                         | 1.02 (0.92 to 1.14)                                  | 1.06 (0.93 to 1.20)                                     |
| <b>Without depression (n=11,048)</b>       |           |                                   |                                                     |                                                             |                                                      |                                                         |
| Non-treatment                              | 7,220     | 88,370.49                         | 8.49 (4.09)                                         | 8.17 (7.98 to 8.36)                                         | Reference                                            | Reference                                               |
| Pretreatment                               | 526       | 900.25                            | 0.07 (0.03)                                         | 58.43 (53.59 to 63.58)                                      | 7.15 (6.55 to 7.81)                                  | 6.95 (6.34 to 7.61)                                     |

|                                |       |           |             |                        |                     |                     |
|--------------------------------|-------|-----------|-------------|------------------------|---------------------|---------------------|
| Cholinesterase inhibitor alone | 1,394 | 14,388.04 | 0.99 (1.98) | 9.69 (9.19 to 10.21)   | 1.19 (1.12 to 1.26) | 1.22 (1.14 to 1.31) |
| Antipsychotic drug alone       | 970   | 8,911.60  | 0.32 (1.13) | 10.88 (10.22 to 11.59) | 1.33 (1.25 to 1.42) | 1.43 (1.32 to 1.56) |
| Combination                    | 938   | 8,280.68  | 0.52 (1.24) | 11.33 (10.62 to 12.07) | 1.39 (1.30 to 1.48) | 1.48 (1.37 to 1.61) |

**Supplementary Table 3-7: Sensitivity analysis (removed patients who died)**

|                                                                                  | Events, n | Follow-up time,<br>person-years,<br>sum | Follow-up time,<br>years, median<br>(interquartile range) | Incidence rate<br>(95% confidence interval),<br>/100 person-years | Crude incidence rate ratio<br>(95% confidence interval) | Adjusted incidence rate ratio<br>(95% confidence interval) |
|----------------------------------------------------------------------------------|-----------|-----------------------------------------|-----------------------------------------------------------|-------------------------------------------------------------------|---------------------------------------------------------|------------------------------------------------------------|
| <b>Removed patients who died during the study period (n=10,080)</b>              |           |                                         |                                                           |                                                                   |                                                         |                                                            |
| Non-treatment                                                                    | 7,017     | 89,208.04                               | 9.43 (3.31)                                               | 7.87 (7.68 to 8.05)                                               | Reference                                               | Reference                                                  |
| Pretreatment                                                                     | 411       | 830.55                                  | 0.07 (0.03)                                               | 49.49 (44.87 to 54.45)                                            | 6.29 (5.70 to 6.95)                                     | 6.43 (5.80 to 7.12)                                        |
| Cholinesterase inhibitor alone                                                   | 1,127     | 13,412.55                               | 1.02 (2.09)                                               | 8.40 (7.92 to 8.90)                                               | 1.07 (1.00 to 1.14)                                     | 1.10 (1.02 to 1.19)                                        |
| Antipsychotic drug alone                                                         | 802       | 8,744.27                                | 0.34 (1.24)                                               | 9.17 (8.55 to 9.82)                                               | 1.17 (1.08 to 1.25)                                     | 1.25 (1.15 to 1.37)                                        |
| Combination                                                                      | 723       | 8,203.00                                | 0.57 (1.36)                                               | 8.81 (8.19 to 9.47)                                               | 1.12 (1.04 to 1.21)                                     | 1.18 (1.08 to 1.30)                                        |
| <b>Removed patients who died within three months after the events (n=15,014)</b> |           |                                         |                                                           |                                                                   |                                                         |                                                            |
| Non-treatment                                                                    | 10,134    | 121,287.44                              | 8.58 (4.00)                                               | 8.36 (8.19 to 8.52)                                               | Reference                                               | Reference                                                  |
| Pretreatment                                                                     | 634       | 1,233.55                                | 0.07 (0.03)                                               | 51.40 (47.51 to 55.51)                                            | 6.15 (5.68 to 6.67)                                     | 6.12 (5.63 to 6.64)                                        |
| Cholinesterase inhibitor alone                                                   | 1,747     | 18,760.15                               | 0.97 (1.92)                                               | 9.31 (8.88 to 9.76)                                               | 1.11 (1.06 to 1.17)                                     | 1.17 (1.10 to 1.24)                                        |
| Antipsychotic drug alone                                                         | 1,295     | 12,944.78                               | 0.36 (1.22)                                               | 10.00 (9.47 to 10.56)                                             | 1.20 (1.13 to 1.27)                                     | 1.30 (1.21 to 1.40)                                        |
| Combination                                                                      | 1,204     | 11,879.29                               | 0.56 (1.32)                                               | 10.14 (9.58 to 10.72)                                             | 1.21 (1.14 to 1.29)                                     | 1.31 (1.22 to 1.41)                                        |

**Supplementary Table 3-8: Sensitivity analysis (redefined outcome by specific codes)**

|                                | Events, n | Follow-up time,<br>person-years,<br>sum | Follow-up time,<br>years, median<br>(interquartile range) | Incidence rate<br>(95% confidence interval),<br>/100 person-years | Crude incidence rate ratio<br>(95% confidence interval) | Adjusted incidence rate ratio<br>(95% confidence interval) |
|--------------------------------|-----------|-----------------------------------------|-----------------------------------------------------------|-------------------------------------------------------------------|---------------------------------------------------------|------------------------------------------------------------|
| <b>All event (n=5,458)</b>     |           |                                         |                                                           |                                                                   |                                                         |                                                            |
| Non-treatment                  | 3,300     | 42,804.53                               | 8.30 (4.06)                                               | 7.71 (7.45 to 7.98)                                               | Reference                                               | Reference                                                  |
| Pretreatment                   | 379       | 453.89                                  | 0.07 (0.04)                                               | 83.50 (75.40 to 92.23)                                            | 10.83 (9.74 to 12.05)                                   | 10.16 (9.10 to 11.35)                                      |
| Cholinesterase inhibitor alone | 648       | 6,716.32                                | 0.96 (1.90)                                               | 9.65 (8.93 to 10.41)                                              | 1.25 (1.15 to 1.36)                                     | 1.22 (1.11 to 1.35)                                        |
| Antipsychotic drug alone       | 594       | 5,272.78                                | 0.42 (1.41)                                               | 11.27 (10.39 to 12.20)                                            | 1.46 (1.34 to 1.59)                                     | 1.52 (1.36 to 1.69)                                        |
| Combination                    | 537       | 4,321.32                                | 0.57 (1.34)                                               | 12.43 (11.41 to 13.51)                                            | 1.61 (1.47 to 1.77)                                     | 1.67 (1.49 to 1.87)                                        |
| <b>Falls (n=621)</b>           |           |                                         |                                                           |                                                                   |                                                         |                                                            |
| Non-treatment                  | 272       | 5,468.39                                | 9.24 (3.26)                                               | 4.97 (4.41 to 5.59)                                               | Reference                                               | Reference                                                  |
| Pretreatment                   | 73        | 51.14                                   | 0.07 (0.03)                                               | 142.70 (112.70 to 178.50)                                         | 28.70 (22.16 to 37.16)                                  | 10.77 (8.19 to 14.16)                                      |
| Cholinesterase inhibitor alone | 95        | 780.78                                  | 1.01 (2.04)                                               | 12.17 (9.90 to 14.81)                                             | 2.45 (1.94 to 3.09)                                     | 0.87 (0.65 to 1.16)                                        |
| Antipsychotic drug alone       | 89        | 474.53                                  | 0.28 (0.94)                                               | 18.76 (15.15 to 22.97)                                            | 3.77 (2.97 to 4.79)                                     | 1.26 (0.91 to 1.74)                                        |
| Combination                    | 92        | 404.43                                  | 0.50 (1.15)                                               | 22.75 (18.44 to 27.77)                                            | 4.57 (3.61 to 5.79)                                     | 1.49 (1.09 to 2.04)                                        |
| <b>Fractures (n=5,149)</b>     |           |                                         |                                                           |                                                                   |                                                         |                                                            |
| Non-treatment                  | 3,139     | 40,185.37                               | 8.25 (4.11)                                               | 7.81 (7.54 to 8.09)                                               | Reference                                               | Reference                                                  |
| Pretreatment                   | 357       | 428.79                                  | 0.07 (0.04)                                               | 83.26 (74.95 to 92.24)                                            | 10.66 (9.55 to 11.89)                                   | 10.41 (9.29 to 11.66)                                      |
| Cholinesterase inhibitor alone | 603       | 6,325.23                                | 0.96 (1.89)                                               | 9.53 (8.80 to 10.32)                                              | 1.22 (1.12 to 1.33)                                     | 1.26 (1.13 to 1.39)                                        |
| Antipsychotic drug alone       | 554       | 5,014.47                                | 0.42 (1.41)                                               | 11.05 (10.16 to 12.00)                                            | 1.41 (1.29 to 1.55)                                     | 1.57 (1.40 to 1.76)                                        |
| Combination                    | 496       | 4,115.68                                | 0.57 (1.34)                                               | 12.05 (11.03 to 13.15)                                            | 1.54 (1.40 to 1.70)                                     | 1.70 (1.51 to 1.91)                                        |

**Supplementary Table 3-9: Sensitivity analysis (counting all episodes of falls and fractures\*, n=15,278)**

|                                | Events, n | Follow-up time,<br>person-years,<br>sum | Follow-up time,<br>years, median<br>(interquartile range) | Incidence rate<br>(95% confidence interval),<br>/100 person-years | Crude incidence rate ratio<br>(95% confidence interval) | Adjusted incidence rate ratio<br>(95% confidence interval) |
|--------------------------------|-----------|-----------------------------------------|-----------------------------------------------------------|-------------------------------------------------------------------|---------------------------------------------------------|------------------------------------------------------------|
| Non-treatment                  | 16,448    | 122,963.00                              | 8.55 (4.01)                                               | 13.38 (13.17 to 13.58)                                            | Reference                                               | Reference                                                  |
| Pretreatment                   | 1,159     | 1,254.90                                | 0.07 (0.03)                                               | 92.36 (87.16 to 97.79)                                            | 6.92 (6.52 to 7.34)                                     | 5.53 (5.21 to 5.88)                                        |
| Cholinesterase inhibitor alone | 3,632     | 19,018.33                               | 0.96 (1.92)                                               | 19.10 (18.48 to 19.73)                                            | 1.43 (1.38 to 1.48)                                     | 1.16 (1.11 to 1.21)                                        |
| Antipsychotic drug alone       | 2,751     | 13,087.45                               | 0.35 (1.21)                                               | 21.02 (20.25 to 21.82)                                            | 1.57 (1.51 to 1.63)                                     | 1.24 (1.18 to 1.31)                                        |
| Combination                    | 2,726     | 12,037.35                               | 0.56 (1.31)                                               | 22.65 (21.81 to 23.51)                                            | 1.69 (1.62 to 1.76)                                     | 1.31 (1.25 to 1.38)                                        |

**Supplementary Table 3-10: Sensitivity analysis (redefined the length of the pretreatment period)**

|                                              | Events, n | Follow-up time, person-years, sum | Follow-up time, years, median (interquartile range) | Incidence rate (95% confidence interval), /100 person-years | Crude incidence rate ratio (95% confidence interval) | Adjusted incidence rate ratio (95% confidence interval) |
|----------------------------------------------|-----------|-----------------------------------|-----------------------------------------------------|-------------------------------------------------------------|------------------------------------------------------|---------------------------------------------------------|
| <b>7 days prior to treatment (n=15,278)</b>  |           |                                   |                                                     |                                                             |                                                      |                                                         |
| Non-treatment                                | 10,343    | 123,433.84                        | 8.58 (4.02)                                         | 8.38 (8.22 to 8.54)                                         | Reference                                            | Reference                                               |
| Pretreatment                                 | 474       | 580.21                            | 0.03 (0.02)                                         | 81.69 (74.58 to 89.30)                                      | 9.75 (8.89 to 10.69)                                 | 9.49 (8.64 to 10.43)                                    |
| Cholinesterase inhibitor alone               | 1,827     | 19,125.99                         | 0.97 (1.92)                                         | 9.55 (9.12 to 10.00)                                        | 1.14 (1.08 to 1.20)                                  | 1.17 (1.10 to 1.25)                                     |
| Antipsychotic drug alone                     | 1,364     | 13,180.82                         | 0.36 (1.21)                                         | 10.35 (9.81 to 10.91)                                       | 1.23 (1.17 to 1.31)                                  | 1.30 (1.21 to 1.39)                                     |
| Combination                                  | 1,270     | 12,037.35                         | 0.56 (1.31)                                         | 10.55 (9.98 to 11.14)                                       | 1.26 (1.19 to 1.33)                                  | 1.32 (1.23 to 1.42)                                     |
| <b>21 days prior to treatment (n=15,278)</b> |           |                                   |                                                     |                                                             |                                                      |                                                         |
| Non-treatment                                | 10,115    | 122,497.41                        | 8.52 (4.01)                                         | 8.26 (8.10 to 8.42)                                         | Reference                                            | Reference                                               |
| Pretreatment                                 | 792       | 1,924.81                          | 0.11 (0.05)                                         | 41.15 (38.35 to 44.09)                                      | 4.98 (4.64 to 5.36)                                  | 4.91 (4.56 to 5.30)                                     |
| Cholinesterase inhibitor alone               | 1,759     | 18,910.18                         | 0.96 (1.91)                                         | 9.30 (8.88 to 9.74)                                         | 1.13 (1.07 to 1.19)                                  | 1.17 (1.10 to 1.24)                                     |
| Antipsychotic drug alone                     | 1,342     | 12,993.52                         | 0.35 (1.21)                                         | 10.33 (9.79 to 10.89)                                       | 1.25 (1.18 to 1.32)                                  | 1.34 (1.25 to 1.44)                                     |
| Combination                                  | 1,270     | 12,037.35                         | 0.56 (1.31)                                         | 10.55 (9.98 to 11.14)                                       | 1.28 (1.21 to 1.35)                                  | 1.37 (1.27 to 1.47)                                     |
| <b>28 days prior to treatment (n=15,278)</b> |           |                                   |                                                     |                                                             |                                                      |                                                         |
| Non-treatment                                | 10,001    | 122,034.57                        | 8.49 (4.01)                                         | 8.20 (8.04 to 8.36)                                         | Reference                                            | Reference                                               |
| Pretreatment                                 | 949       | 2,591.75                          | 0.15 (0.07)                                         | 36.62 (34.34 to 39.00)                                      | 4.47 (4.18 to 4.78)                                  | 4.43 (4.14 to 4.75)                                     |
| Cholinesterase inhibitor alone               | 1,736     | 18,802.14                         | 0.96 (1.91)                                         | 9.23 (8.81 to 9.68)                                         | 1.13 (1.07 to 1.19)                                  | 1.18 (1.11 to 1.25)                                     |
| Antipsychotic drug alone                     | 1,322     | 12,901.92                         | 0.35 (1.22)                                         | 10.25 (9.71 to 10.81)                                       | 1.25 (1.18 to 1.32)                                  | 1.35 (1.26 to 1.45)                                     |
| Combination                                  | 1,270     | 12,037.35                         | 0.56 (1.31)                                         | 10.55 (9.98 to 11.14)                                       | 1.29 (1.21 to 1.36)                                  | 1.39 (1.29 to 1.49)                                     |

**Supplementary Table 3-11: Sensitivity analysis (focusing on individual antipsychotic drugs)**

|                                | Events, n | Follow-up time,<br>person-years,<br>sum | Follow-up time,<br>years, median<br>(interquartile range) | Incidence rate<br>(95% confidence interval),<br>/100 person-years | Crude incidence rate ratio<br>(95% confidence interval) | Adjusted incidence rate ratio<br>(95% confidence interval) |
|--------------------------------|-----------|-----------------------------------------|-----------------------------------------------------------|-------------------------------------------------------------------|---------------------------------------------------------|------------------------------------------------------------|
| <b>Haloperidol (n=4,745)</b>   |           |                                         |                                                           |                                                                   |                                                         |                                                            |
| Non-treatment                  | 3,307     | 40,792.32                               | 9.19 (3.79)                                               | 8.11 (7.83 to 8.39)                                               | Reference                                               | Reference                                                  |
| Pretreatment                   | 367       | 368.10                                  | 0.07 (0.00)                                               | 99.70 (89.89 to 110.30)                                           | 12.30 (11.04 to 13.70)                                  | 12.11 (10.84 to 13.54)                                     |
| Cholinesterase inhibitor alone | 812       | 8,985.84                                | 1.18 (2.31)                                               | 9.04 (8.43 to 9.67)                                               | 1.11 (1.03 to 1.20)                                     | 1.16 (1.06 to 1.27)                                        |
| Antipsychotic drug alone       | 166       | 666.06                                  | 0.06 (0.08)                                               | 24.92 (21.34 to 28.94)                                            | 3.07 (2.63 to 3.59)                                     | 3.75 (3.15 to 4.47)                                        |
| Combination                    | 93        | 340.37                                  | 0.05 (0.07)                                               | 27.32 (22.18 to 33.32)                                            | 3.37 (2.74 to 4.14)                                     | 4.26 (3.37 to 5.37)                                        |
| <b>Risperidone (n=5,119)</b>   |           |                                         |                                                           |                                                                   |                                                         |                                                            |
| Non-treatment                  | 3,716     | 42,362.60                               | 8.78 (3.90)                                               | 8.72 (8.44 to 9.00)                                               | Reference                                               | Reference                                                  |
| Pretreatment                   | 98        | 393.72                                  | 0.07 (0.00)                                               | 24.89 (20.32 to 30.20)                                            | 2.84 (2.32 to 3.47)                                     | 2.74 (2.23 to 3.35)                                        |
| Cholinesterase inhibitor alone | 886       | 8,724.17                                | 1.17 (2.18)                                               | 10.16 (9.50 to 10.84)                                             | 1.16 (1.08 to 1.25)                                     | 1.23 (1.13 to 1.35)                                        |
| Antipsychotic drug alone       | 209       | 2,132.31                                | 0.18 (0.49)                                               | 9.80 (8.54 to 11.20)                                              | 1.12 (0.97 to 1.28)                                     | 1.15 (0.99 to 1.35)                                        |
| Combination                    | 210       | 1,907.57                                | 0.25 (0.58)                                               | 11.01 (9.59 to 12.58)                                             | 1.26 (1.09 to 1.44)                                     | 1.32 (1.13 to 1.54)                                        |
| <b>Olanzapine (n=1,314)</b>    |           |                                         |                                                           |                                                                   |                                                         |                                                            |
| Non-treatment                  | 946       | 11,324.34                               | 9.21 (3.50)                                               | 8.35 (7.83 to 8.90)                                               | Reference                                               | Reference                                                  |
| Pretreatment                   | 30        | 97.09                                   | 0.07 (0.00)                                               | 30.90 (21.23 to 43.55)                                            | 3.70 (2.57 to 5.32)                                     | 3.72 (2.57 to 5.37)                                        |
| Cholinesterase inhibitor alone | 217       | 2,167.76                                | 1.10 (2.08)                                               | 10.01 (8.74 to 11.41)                                             | 1.20 (1.03 to 1.39)                                     | 1.31 (1.09 to 1.56)                                        |
| Antipsychotic drug alone       | 59        | 569.52                                  | 0.18 (0.53)                                               | 10.36 (7.96 to 13.27)                                             | 1.24 (0.95 to 1.61)                                     | 1.35 (1.00 to 1.82)                                        |
| Combination                    | 62        | 469.79                                  | 0.26 (0.67)                                               | 13.20 (10.21 to 16.81)                                            | 1.58 (1.22 to 2.04)                                     | 1.77 (1.31 to 2.39)                                        |
| <b>Quetiapine (n=12,851)</b>   |           |                                         |                                                           |                                                                   |                                                         |                                                            |
| Non-treatment                  | 8,769     | 104,168.20                              | 8.61 (3.96)                                               | 8.42 (8.24 to 8.60)                                               | Reference                                               | Reference                                                  |
| Pretreatment                   | 481       | 1,013.41                                | 0.07 (0.00)                                               | 47.46 (43.36 to 51.85)                                            | 5.64 (5.14 to 6.18)                                     | 5.40 (4.91 to 5.93)                                        |
| Cholinesterase inhibitor alone | 1,635     | 16,682.60                               | 0.98 (1.94)                                               | 9.80 (9.33 to 10.28)                                              | 1.16 (1.10 to 1.23)                                     | 1.18 (1.11 to 1.26)                                        |
| Antipsychotic drug alone       | 1,002     | 10,353.62                               | 0.34 (1.19)                                               | 9.68 (9.09 to 10.29)                                              | 1.15 (1.08 to 1.23)                                     | 1.16 (1.07 to 1.26)                                        |
| Combination                    | 964       | 9,884.87                                | 0.54 (1.27)                                               | 9.75 (9.15 to 10.38)                                              | 1.16 (1.08 to 1.24)                                     | 1.16 (1.07 to 1.26)                                        |

**Supplementary Table 3-12: Sensitivity analysis (Further defined two study periods of 14 days: one after treatment initiation, and the other following treatment discontinuation, n=15,278)**

|                                                 | Events, n | Follow-up time, person-years, sum | Follow-up time, years, median (interquartile range) | Incidence rate (95% confidence interval), /100 person-years | Crude incidence rate ratio (95% confidence interval) | Adjusted incidence rate ratio (95% confidence interval) |
|-------------------------------------------------|-----------|-----------------------------------|-----------------------------------------------------|-------------------------------------------------------------|------------------------------------------------------|---------------------------------------------------------|
| Non-treatment                                   | 10,066    | 121,519.29                        | 8.45 (4.05)                                         | 8.28 (8.12 to 8.45)                                         | Reference                                            | Reference                                               |
| Pretreatment (day -14 days of treatment)        | 657       | 1,254.90                          | 0.07 (0.03)                                         | 52.35 (48.46 to 56.47)                                      | 6.32 (5.84 to 6.84)                                  | 6.12 (5.64 to 6.64)                                     |
| Treatment (day 1 to day 14 of treatment)        | 325       | 1,136.03                          | 0.08 (0)                                            | 28.61 (25.62 to 31.85)                                      | 3.45 (3.09 to 3.86)                                  | 3.31 (2.96 to 3.70)                                     |
| Cholinesterase inhibitor (day 14+ of treatment) | 1,746     | 18,613.18                         | 0.95 (1.92)                                         | 9.38 (8.95 to 9.83)                                         | 1.13 (1.08 to 1.19)                                  | 1.16 (1.09 to 1.24)                                     |
| Antipsychotic drug (day 14+ of treatment)       | 1,164     | 12,666.02                         | 0.35 (1.27)                                         | 9.19 (8.67 to 9.73)                                         | 1.11 (1.04 to 1.18)                                  | 1.13 (1.05 to 1.22)                                     |
| Combination (day 14+ of treatment)              | 1,178     | 11,652.41                         | 0.58 (1.34)                                         | 10.11 (9.55 to 10.70)                                       | 1.22 (1.15 to 1.30)                                  | 1.26 (1.17 to 1.36)                                     |
| Day 1 to day 14 after drug discontinuation      | 142       | 1,362.32                          | 0.07 (0.10)                                         | 10.42 (8.81 to 12.25)                                       | 1.26 (1.07 to 1.49)                                  | 1.24 (1.05 to 1.47)                                     |



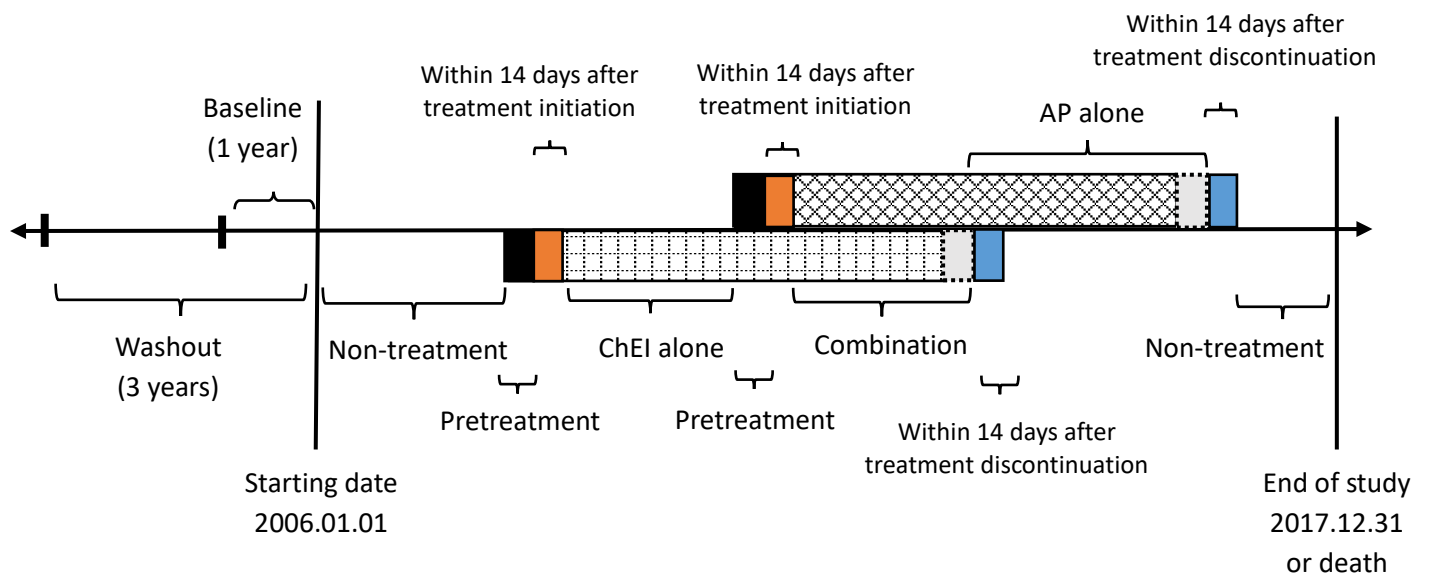

Abbreviation: ChEI, cholinesterase inhibitor; AP, antipsychotic drug

### Supplementary Figure 1. Study scheme and definitions of treatment periods for sensitivity analysis

We defined a 3-year washout period before the starting date to exclude patients with a prior history of falls and fractures. We defined a 1-year baseline period to assess patients' baseline covariates. 1) 14-day pretreatment period prior to the treatment to drugs, 2) treatment to ChEIs alone, 3) treatment to antipsychotic drugs alone, 4) treatment to a combination of ChEIs and antipsychotic drugs, and 5) non-treatment when neither ChEIs nor antipsychotic drugs were given. If a refill was noted within 14 days after the end date of the last prescription (i.e., 14-day grace period), it was considered as a continuation of a previous prescription. We further classified the periods 6) within 1-14 days after treatment, and 7) within 1-14 days after discontinuation of treatment. The remaining time periods without prescription of ChEIs or antipsychotic drugs were defined as non-treatment.
